# Supplementary material for: Metallopolymer precursors to L10-CoPt nanoparticles: synthesis, characterization, nanopatterning and potential application
Source: Royal Society of Chemistry journal article supplement (doi:10.1039/c6nr00034g), 2016-01-01
Supplement: c6nr00034g1.pdf [file c6nr00034g1.pdf]

## Supplementary Information

# Metallopolymer precursor to ferromagnetic L1<sub>0</sub>-CoPt nanoparticles: synthesis, characterization, nanopatterning study and potential application in data storage system

Qingchen Dong,<sup>\*a</sup> Wenshan Qu,<sup>b</sup> Wenqing Liang,<sup>a</sup> Kunpeng Guo,<sup>a</sup> Haibin Xue,<sup>c</sup> Yuanyuan Guo,<sup>c</sup> Zhengong Meng,<sup>d</sup> Cheuk-Lam Ho,<sup>d</sup> Chi-Wah Leung,<sup>\*e</sup> Wai-Yeung Wong<sup>\*ad</sup>

Received (in XXX, XXX) Xth XXXXXXXXXX 20XX, Accepted Xth XXXXXXXXXX 20XX

DOI: 10.1039/b000000x

---

<sup>a</sup>MOE Key Laboratory for Interface Science and Engineering in Advanced Materials and Research Center of Advanced Materials Science and Technology, Taiyuan University of Technology, 79 Yingze West Street, Taiyuan 030024, P.R. China. E-mail: dongqingchen@tyut.edu.cn (Q. Dong).

<sup>b</sup>Institute of Carbon Materials Science, Shanxi Datong University, Datong 037009, P. R. China.

<sup>c</sup>College of Physics and Optoelectronics, Taiyuan University of Technology, 79 Yingze West Street, Taiyuan 030024, P.R. China.

<sup>d</sup>Institute of Molecular Functional Materials and Department of Chemistry, Hong Kong Baptist University, Waterloo Road, Hong Kong, P.R. China; HKBU Institute of Research and Continuing Education, Shenzhen Virtual University Park, Shenzhen, 518057, P.R. China. E-mail: rwywong@hkbu.edu.hk, Fax: +852-3411-7348.

<sup>e</sup>Department of Applied Physics, Hong Kong Polytechnic University, Hung Hom, Hong Kong, P. R. China. E-mail: dennis.leung@polyu.edu.hk. Fax: +852-2333-7629.

**Scherrer Analysis:**Scherrer Equation:  $D = 0.9\lambda/(\beta\cos2\theta)$ 

D: Particle diameter

 $\lambda$ : Wavelength $\theta$ : Diffraction angle $\beta$ : Full-width at half maximum in rad (FWHM)For Cu,  $\lambda=0.154178$  nmHere,  $D = 0.9 * 0.154178 / (0.04839 * \cos 41.0825) = 3.8$  nm**Table S1.** Original data for the PXRD pattern of as-prepared powder for CoPt NPs.

| Pos. [°2Th.] | Height [cts] | FWHM [°2Th.] | d-spacing [Å] | Rel. Int. [%] |
|--------------|--------------|--------------|---------------|---------------|
| 23.8773      | 31.60        | 0.0200       | 3.70063       | 33.02         |
| 32.9157      | 27.40        | 0.6610       | 2.71828       | 28.63         |
| 41.0825      | 95.69        | 0.4839       | 2.19026       | 100.00        |
| 47.1555      | 27.38        | 1.2590       | 1.91175       | 28.62         |
| 49.0624      | 7.85         | 0.4982       | 1.88622       | 8.20          |
| 53.6155      | 5.60         | 0.3066       | 1.70443       | 5.85          |
| 60.3920      | 7.50         | 0.4927       | 1.53039       | 7.83          |
| 68.9802      | 3.00         | 1.2000       | 1.37630       | 3.14          |
| 70.5237      | 10.40        | 1.1763       | 1.33816       | 10.87         |
| 83.6005      | 9.80         | 0.1912       | 1.15247       | 10.24         |
| 86.3451      | 7.66         | 0.0200       | 1.13388       | 8.01          |

**Table S2.** Diffraction peaks and 2 $\theta$  values for the PXRD pattern of as-prepared powder for CoPt NPs and corresponding values in the database (JCPDS no. 43-1358).

| Diffraction peak | 2 $\theta$ (measured in this work) | 2 $\theta$ (reported in the database) | Diffraction peak | 2 $\theta$ (measured in this work) | 2 $\theta$ (reported in the database) |
|------------------|------------------------------------|---------------------------------------|------------------|------------------------------------|---------------------------------------|
| (001)            | 23.877                             | 24.025                                | (112)            | 60.392                             | 60.764                                |
| (110)            | 32.915                             | 33.266                                | (220)            | 68.980                             | 69.877                                |
| (111)            | 41.082                             | 41.463                                | (202)            | 70.523                             | 71.028                                |
| (200)            | 47.155                             | 47.621                                | (331)            | 83.600                             | 84.648                                |
| (002)            | 49.062                             | 49.268                                | (113)            | 86.345                             | 86.905                                |
| (201)            | 53.615                             | 54.162                                |                  |                                    |                                       |

**Table S3.** EDX results of as-prepared powder for CoPt NPs.

| Element | Weight % | Atomic % | Uncert. % | Correction | k-Factor |
|---------|----------|----------|-----------|------------|----------|
| C(K)    | 65.92    | 91.30    | 0.48      | 0.26       | 3.940    |
| O(K)    | 2.36     | 2.45     | 0.04      | 0.49       | 1.974    |
| Si(K)   | 0.00     | 0.00v    | 100.00    | 0.92       | 1.000    |
| Co(K)   | 3.38     | 0.95     | 0.04      | 0.99       | 1.495    |
| Cu(K)   | 16.23    | 4.24     | 0.13      | 0.99       | 1.667    |
| Pt(L)   | 12.09    | 1.03     | 0.16      | 0.75       | 5.547    |

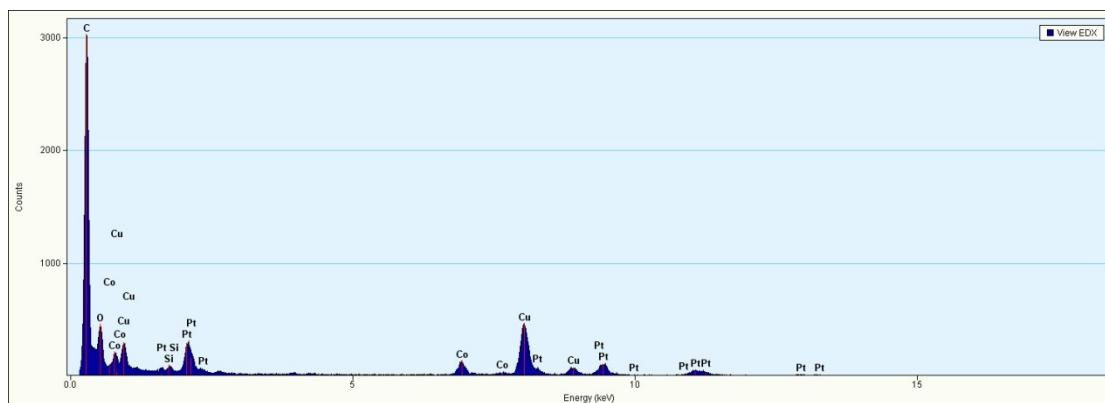

**Figure S1.** EDX spectrum of as-prepared powder for CoPt NPs.

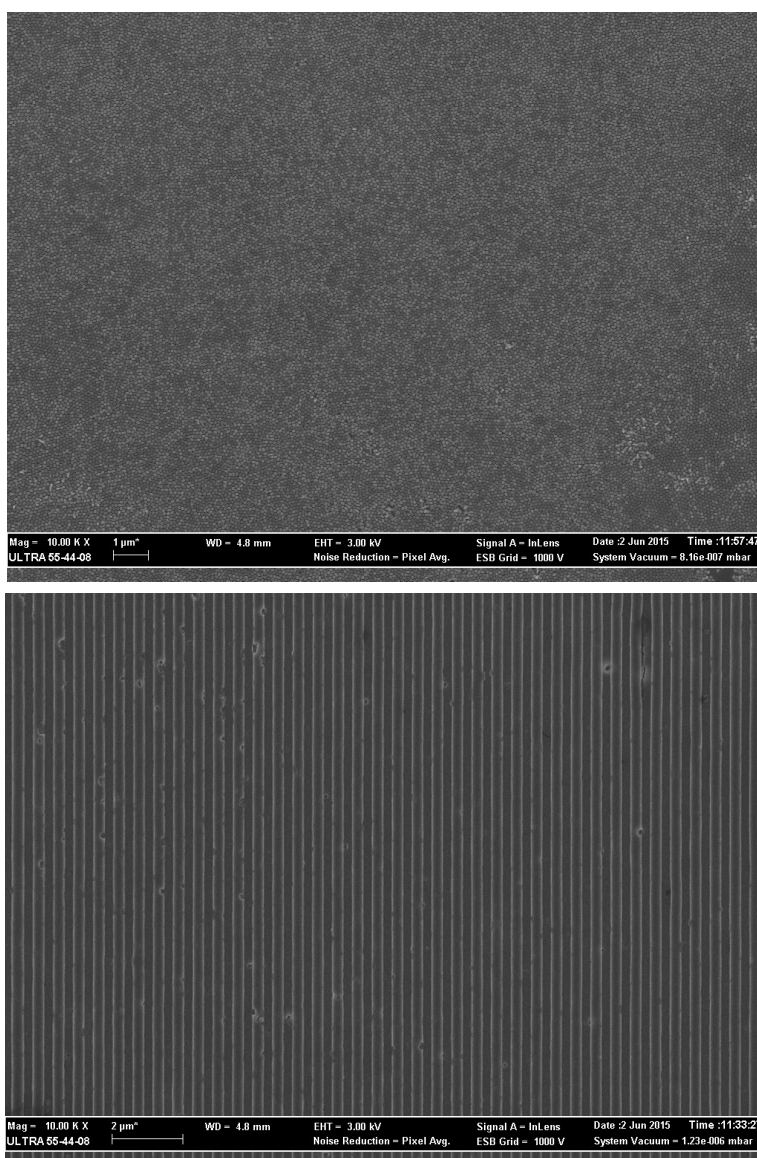

**Figure S2.** Zoom out SEM images of nanopatterned porphyrin-based CoPt-containing polymer and PS polymer blend through nanoimprint lithography: (up) nanodot patterns with periodicity of 100 nm which were fabricated by nanoimprinting with AAO template, (bottom) nanoline pattern with periodicity of 550 nm.
